# Supplementary material for: Photo-reduction assisted synthesis of W-doped TiO2coupled with Au nanoparticles for highly efficient photocatalytic hydrogen evolution
Source: Royal Society of Chemistry journal article supplement (doi:10.1039/c6ce02417c), 2016-12-19
Supplement: c6ce02417c1.pdf [file c6ce02417c1.pdf]

## Electronic supplementary information

### Photo-reduction assisted synthesis of W-doped TiO<sub>2</sub> coupled with Au nanoparticles for highly efficient photocatalytic hydrogen evolution

Bing Liu<sup>1</sup>, Shuangyue Su<sup>1</sup>, Wenhui Zhou, Yin Wang, Ding Wei, Lihua Yao, Yuanman Ni, Minhua Cao\* and Changwen Hu\*

Key Laboratory of Cluster Science, Ministry of Education of China, Beijing Key Laboratory of Photoelectronic/Electrophotonic Conversion Materials, School of Chemistry and Chemical Engineering, Beijing Institute of Technology, Beijing 100081, P. R. China.

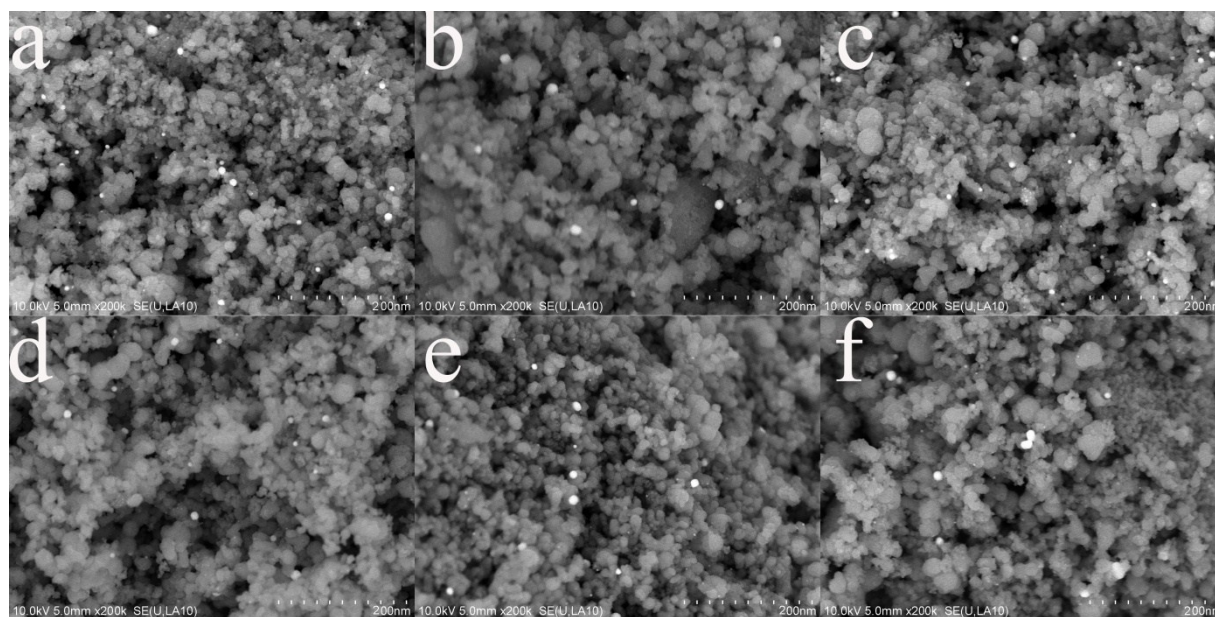

**Fig. S1** (a-f) FE-SEM images of the as-prepared W-TiO<sub>2</sub>/Au hybrids.

## Elemental analysis:

**Table S1** Elemental analysis of all the as-prepared samples

| Samples               | Weight (g) | Weight percent (%) |      |
|-----------------------|------------|--------------------|------|
|                       |            | Au                 | W    |
| Sample A              | 0.0192     | 0.96               | 0.70 |
| Sample B              | 0.0203     | 1.15               | 0.76 |
| Sample C              | 0.0202     | 1.37               | 0.78 |
| Sample D              | 0.0202     | 1.93               | 0.83 |
| Sample E              | 0.0207     | 1.94               | 0.97 |
| Sample F              | 0.0206     | 2.90               | 1.03 |
| *W-TiO <sub>2</sub>   | 0.0205     | 0                  | 0.71 |
| *TiO <sub>2</sub> /Au | 0.0209     | 0.95               | 0    |

H<sub>4</sub>SiW<sub>12</sub>O<sub>40</sub> (HSiW) used in our experiment serves as the reducing and capping agent for HAuCl<sub>4</sub>. First, HSiW was reduced to heteropoly blue by isopropanol (IPA) under mercury lamp irradiation. Then the HAuCl<sub>4</sub> was reduced by the as-formed heteropoly blue to form Au nanoparticles (NPs) and simultaneously SiW<sub>12</sub>O<sub>40</sub><sup>4-</sup> coated on the surface of Au NPs, thus hindering the further growth of Au crystals. Similar work has been reported in literature (S. Mandal, P. R. Selvakannan, R. Pasricha and M. Sastry, *J. Am. Chem. Soc.*, 2003, **125**, 8440.). The more the HAuCl<sub>4</sub> was used, the more Au NPs were generated, thus leading to more HSiW adsorbed on the surface of as-formed Au NPs. The un-adsorbed HSiW is easily washed away during the process of centrifugating and cleaning. So, the amount of W doped TiO<sub>2</sub> increased with amount of HAuCl<sub>4</sub> added.
